# Supplementary material for: Aquaporins are main contributors to root hydraulic conductivity in pearl millet [Pennisetum glaucum (L) R. Br.]
Source: PLOS journal article supplement (doi:10.1371/journal.pone.0233481), 2020-10-01
Supplement: S11 (10.1371/journal.pone.0233481.s011) [file journal.pone.0233481.s011]

### S3 Figure. Conserved domains and membrane topology of the TIP isoforms from pearl millet.

Alignment of the TIP isoforms were obtained using ClustalW in Mega7. Sequence identities and similarities (80%) are highlighted in colors. The transmembrane domains are represented by orange bars and the N-terminal and C-terminal ends of the protein are located in the cytosol. NPA: Asparagine-Proline-Alanine motifs; \*: Aromatic/Arginine selectivity filters; #: Froger's residues.

|                                                                                              |                                                                                                     |     |
|----------------------------------------------------------------------------------------------|-----------------------------------------------------------------------------------------------------|-----|
| PgTIP1-1                                                                                     | -----MPISRIAVGSHQE-VYHPGALAAFAFISTLIFVFAGQSGMAFSLSPGGS-----SPAGLISAAIAHAFALFVAVSVGANISGG            | 81  |
| PgTIP2-1                                                                                     | -----MVKLAFGSGID-SFSAASLAAVVAFFIATLLVFAGVGSIAIAYSQLTKGGAL-----DPAGLVIAIAHAFALFVGVSMANISGG           | 80  |
| PgTIP2-2                                                                                     | -----MTGNIAFGSFGD-SFSAASLAAVVAFFISSLVVFAGVGSIAIAYRKLSDGAPL-----DATGLVAVVCHGFALFVAVAIKANISGG         | 81  |
| PgTIP2-3                                                                                     | -----MVKLAFGSGVD-SFSATSLAAVVAFFIATLLVFAGVGSIAIAYGQLSHGGAL-----DASGLVAIAIAHAFALFVGVSTAAISGG          | 80  |
| PgTIP3-1                                                                                     | MSTGARPGRRFTVGRSED-ATHPDTIAAISEFLATAIFVFAAEGSVLSLGRMYHDS-----TAGGLVAVALAHALASVAVAVAVNISGG           | 86  |
| PgTIP4-1                                                                                     | -----MQKFVDSYDDAGQDAGCVAAVLAFVLTFLFVFTVVSAAMGAGEATP-----MATLAAVALANALAAAGVLVTAGFHVISGG              | 76  |
| PgTIP4-2                                                                                     | -----MAKLTGRRGE-SSEPDPFFKGVLGELVLTFLFVVFQVGAAMAIHVG-----GNLAAVALGQALVVCVIATAGFHISGG                 | 72  |
| PgTIP4-3                                                                                     | -----MAKFALGHHRE-VADAGCISVIAFFILTFLFIFAGVGSAMATSKLGDGAD-----TVVGLTAVSLAHTLVVAGMVSAGLHVSAG           | 79  |
| PgTIP5-1                                                                                     | -----MASNLLTKLKR-CVSPPSLSYFAFFISTFLFVFAAVGSAISARMVTTAPDVGTAASHCGTASDAASLVATAVAQAFGLFAAVLIAADVSGG    | 92  |
| <div> <div>NPA</div> <div>#</div> <div>*</div> </div>                                        |                                                                                                     |     |
| PgTIP1-1                                                                                     | AVNPAVTFGAFVGGNITLFRGILYWAQLLGSTVACFLLRFTGGLPTGT-FGLT-GISVWEALVLIIVMTFGLVYTVYAT----AVDPK---GSLG-T   | 171 |
| PgTIP2-1                                                                                     | VLNPAVTFGLAVGGHITILTGLFYWVAQLLGASAACLLRFVTHGQAIPT-HGVS-GISEVEGVVMEIVITFALVYTVYAT----AADPK---GSLG-T  | 170 |
| PgTIP2-2                                                                                     | AVNPAVTFGLVGGQITMLTGLFYWIAQLVGAIVGAVLVQFST-GVATPT-HGLS-GIGTLEGVVMIIIVTFGLVYTVYAT----AADPK---GSLG-T  | 170 |
| PgTIP2-3                                                                                     | VLNPAVTFGLAVGGHITILTGLFYWVAQLLGASVACLLKFTVTHGKAIPT-HGVA-GISELEGVVFIIITFALVYTVYAT----AADPK---GSLG-T  | 170 |
| PgTIP3-1                                                                                     | AVNPAITFGALIGGRVSLVRAVFYWAAQLLGAVAASLLRLATGGARPPG-FALATGVGDWHAVLLAAMTFGLMYAYYAT----VIDPK---GSVG-T   | 177 |
| PgTIP4-1                                                                                     | VLNPSVSVAMMVRGHLKSLRTVLVTAQLLASSLACVLLRLYLTGGMVTPV-HALGAGIRPMQGVVMEVILTFSLLEFVYAM----ILDP---SQVR-T  | 166 |
| PgTIP4-2                                                                                     | AVNPAVTLSLAVGQITLFRSALYVVAQVAGSSAACLLLRWLKGLATPV-HALAAGVGPAQGVVAHAVFTFSLLEFVIYAT----ILDPSP---KVLP-G | 164 |
| PgTIP4-3                                                                                     | VINPAVTLGLAATGRVTLTLLSAAFVAAQLLASASACVLLRYLTGGAPIVRHSLAAGVGPLQGVLMFAVLTFSLLFTVYAT----IVDP---RTVG-G  | 170 |
| PgTIP5-1                                                                                     | AVNPAVTFFAIGGHIGVPSAIFYWASQMLGSTFACLAVPTTRIAVAMTG-----FGAIIIVAVITFMLVYSAHVAGDLRAAGSGGKQGLAATA       | 182 |
| <div> <div>*</div> <div>NPA</div> <div>#</div> <div>*</div> <div>#</div> <div>#</div> </div> |                                                                                                     |     |
| PgTIP1-1                                                                                     | IAPIAIGFIVGANILVGGAFDGAASMPAVSFGPALVSWSGYQWVYVWVGLIGGGLAGIIVVLFISHT-----HEQLPTTDY-                  | 249 |
| PgTIP2-1                                                                                     | IAPMAIGFIVGANILAAGPFGSGSMTPASFGPAVAAGNFAGNWWVWVGLIGGGLAGLVYGDVFIAS-----YQPVG-QEYP                   | 247 |
| PgTIP2-2                                                                                     | IAPIAIGFIVGANILVAGPFGSGSMNPASFGPAVASGDFTNIIYVWVGLVGGGLAGIVRYIYMGCD-----HAPVASSDF-                   | 248 |
| PgTIP2-3                                                                                     | IAPIAIGFIVGANILAAGPFGSGSMNPASFGPAVAAGNFAGNWWVWVGLIGGGLAGLVYGDVFIGGN-----YQVADQDYA                   | 249 |
| PgTIP3-1                                                                                     | IGPLAVGFLGANVLAGGPFDDGAGMNPANVFGPALVGRWRHWHVYVWVGLIFLAGIAGIVVEYLVIIPAADAAAAHAHPHQPLAPEDY-           | 266 |
| PgTIP4-1                                                                                     | IGPLLTGLIVGANSLAGGNFTGASMNPAISFGPALATGDTTHHWVYVWVGLLGGPLAAVVEVSVFIN-----KTHEPLNNSDC-                | 245 |
| PgTIP4-2                                                                                     | AGPLLTGLLVGANSVAGAVLSGASMNPAISFGPAVATGVVTHHWVYVWVGLAGGPLAVVVEWLFMTAAA-----AHHQHLLTGEEA              | 247 |
| PgTIP4-3                                                                                     | TRPLLVALLVVGANIAGGPFSGASMNPAISFGPALAAGVDDHWVYVWVGLVGGALAGMVVDGLFMAQAG-----EHEQLPKG---               | 248 |
| PgTIP5-1                                                                                     | LGALAVGLVAGALVLSAGPLTGASMNPAISFGPAVVSQDKNQAVVWVGMIGAATAAALAHQILAGPSDAATAG-LSSSRHGSYETVVV-           | 270 |
