# Supplementary material for: Aquaporins are main contributors to root hydraulic conductivity in pearl millet [Pennisetum glaucum (L) R. Br.]
Source: PLOS journal article supplement (doi:10.1371/journal.pone.0233481), 2020-10-01
Supplement: S12 (10.1371/journal.pone.0233481.s012) [file journal.pone.0233481.s012]

**S4 Figure. Conserved domains and membrane topology of the NIP isoforms from pearl millet.** Alignment of the NIP isoforms were obtained using ClustalW in Mega7. Sequence identities and similarities (80%) are highlighted in colors. The transmembrane domains are represented by orange bars and the N-terminal and C-terminal ends of the protein are located in the cytosol. NPA: Asparagine-Proline-Alanine motifs; \*: Aromatic/Arginine selectivity filters; #: Froger's residues.

|                                                                                |                                                                                                        |     |
|--------------------------------------------------------------------------------|--------------------------------------------------------------------------------------------------------|-----|
| PgNIP1-1                                                                       | -----MAGGGDNSTNGARD-QRAMEEGRKQ-----EEFAA--DQ-----GC-AALSVPFIQIIAIFGTFFLIFAGCGAVTINASR                  | 68  |
| PgNIP1-2                                                                       | -----MAG-AEVANGGLHESHTVAMEEGRVG-----DEACR--ERSEQDGAGCRPMFVVPFVQIIAIFGTFFLIFAGCAAVAVNLRT                | 75  |
| PgNIP1-4                                                                       | -----MARREDDSYTNGSVFEVSVEDGRKDKSDAHAYADAVQQPAD--EADGDIDAVCGMPASVSFIQOLIAFLATEFFLIFAGCGVITVND-K         | 86  |
| PgNIP2-1                                                                       | -----MSTN-----SRSNSRANFNNEIHDISTVQN--STMPPMYYSERSLADFFPPHLLKVVSVVSTELLVFVTCGAAIASASD                   | 74  |
| PgNIP2-2                                                                       | -----MAASTAPSRNTSRVNSYNEIHDISTVQSGGSAVPTMYYPEKSLADIFFPHLGGKVVISVVVATELLVFVTCGAASIYGAD                  | 79  |
| PgNIP3-1                                                                       | MEPESTPPNGSAPATPGTPAPLFSNGPRVDSARSMSYDRKSMPCRCLPAVEGEGVATHTCCVVEIPAPDVSLTRGLGAFVGTFFLIFATAAPIVNQKY     | 100 |
| PgNIP3-2                                                                       | -----MPFELLSTGGSVS-SHPHNADAAESSDAHAAAHFHR--WNQGLP-----KIKAVPLKKVVAFVLGTFFLIFATVLSIIMNEQH               | 75  |
| PgNIP3-3                                                                       | -----MQFELLSAGSVS-SHPHNADAAKSSDAHAAAHYHR--WNQGLP-----KIKAVPLKKVVAFVLGTFFLIFATVLSIIMNEQH                | 75  |
| PgNIP3-4                                                                       | -----MIFSKSPSNK-TLPQWVQN-----EAPPPAPFSEKRVALALVKMA--FLGTSLLIPTVLSALIMNEEH                              | 62  |
| PgNIP3-5                                                                       | -----MDVLVSIPIAAAAPMESMSDDKIAIVPHKSPSNKQILPLGFQEFND--PSPPPPGGFAN-RVALPLIKVAAALLGTFFLIFVLSAATIDEAH      | 92  |
| PgNIP4-1                                                                       | -----MAADHVGGNVAAAGSDGDQRSKVNGGQDDLEQQPRRGDQLEPAADHVSSRGLAVAHFVRELMLVGVASEVLLVFS-GVATLMQDM             | 83  |
| <div> <div></div> <div>*</div> <div>NPA</div> <div>#</div> </div>              |                                                                                                        |     |
| PgNIP1-1                                                                       | DGQITFPGVAIVWGLAVMMVYAVGISGAFNPFAVTFATCGRFPWRQLPAVVLQMLGATLASCTLLMFGRHEHFF--GTLPTGSDAQSLVITII          | 166 |
| PgNIP1-2                                                                       | GGTITFPGICIVWGLAVMMVYVSGISGALNPFAVSIATCGRFPWRQVPAAAAVMGAAAASLTLLFPGNAREHFF--GTVPAGSDVQSLVIELI          | 173 |
| PgNIP1-4                                                                       | NGMATFPGVAIVWGMTVMAMIYAVGISGALNPFAVTVGFA-----VPAYMVVQLVAATIASLILMLFDRQHEVAA--VTVPGVSNIQSLVLEFI         | 175 |
| PgNIP2-1                                                                       | LNRISQLGQSVAGGLIVTVMYIYAVGISGAMNPFAVTLAFVFRHFPWIQVPFYWAAQFTGAICAFVLAVLHPITVIG--TTTPTGPHWHALVIEVI       | 171 |
| PgNIP2-2                                                                       | LKRVSQQLGQSVVGLIVTVMYIATGISGAMNPFAVTLSPACFRHFPWIQVPFYWAAQFTGAMCAAFVLAVLHPITVIG--TTTPTGPHWQALVVEIV      | 176 |
| PgNIP3-1                                                                       | GGATSPFGNAACAGLAVTIIILSTGISGALNPSTLIATFAALRHFPWLQVPVSVQVLGSIACAFALGVF--HPFLSGGVTVDPDTISTAQAFTFEII      | 199 |
| PgNIP3-2                                                                       | DGVESLLGIATSAGLAVTILVLSLISGCLNPFAVSIAMTFGHLPHGHLLPYITAILGSIASFSVVCIIY-HPVNPFG--IATIPNVGTTEAFFLEFI      | 172 |
| PgNIP3-3                                                                       | DGVESLLGIATSAGLAVTILVLSLISGCLNPFAVSIAMTFGHLPHGHLLPYITAILGSIASFSVVCIIY-HPVNPFG--IATIPNVGTTEAFFLEFI      | 172 |
| PgNIP3-4                                                                       | GGALGLLGVAAAAGSAVLVIVASLVVSGGLNPFAVSVAMATFGFLPRAHLPLVYAAQFLGSMTASFAAAVYSNPANLGATVATVPTVGGAALVVEFV      | 162 |
| PgNIP3-5                                                                       | GGALGLLGVAAAAGSAVLVIVASLVVSGGLNPFAVSVAMATFGFLPRAHLPLVYAAQFLGATAASFAAALYDDPANMAATVATVPTVGGAQAFVFEFA     | 192 |
| PgNIP4-1                                                                       | HGTLSPFMVCLVMALTIVGFIICWLG---PAIFNPFAVTFATFAAFGLSWAKLPFYVMVQLAGSVLACLVSNGVMRPREEHFYGTAPMP-GQTRLPFLLILL | 179 |
| <div> <div></div> <div>*</div> <div>NPA</div> <div>#</div> <div>#</div> </div> |                                                                                                        |     |
| PgNIP1-1                                                                       | TFYFLMFVISGVATINRAIGLAGLAVGATILLNVLIAGPVSGASMNPAITVGPALVSGQYRSIIVVVVGVVGVAGAVAWAYNLIPTNKPLREITKSTS     | 266 |
| PgNIP1-2                                                                       | ISPNLMFVVSAVATINRAIGLAGLAVGATVLLNVLFAGPIISGASMNPAITLGPALVAGRTAGIWWYFVGPIILGTVAGAWAYNLIPTDKPLREITQTSS   | 273 |
| PgNIP1-4                                                                       | ITFYLMFVIMAVATIDNAVGQAGLAVGGTIMLNALFAGPVSGASMNPAITLGPALVAGRTAGIWWYFVGPIILGTVAGAWAYNLIPTDKTLAEITKSTS    | 275 |
| PgNIP2-1                                                                       | VTFNMMEVTVLAVATITAVGELAGLAVGSAVCITSIFAGAVSGGSMNPATLGPALASNLITGLWLYFLGPVGLTSLGAWTYTYIFEEAPSNGKEPQKL     | 271 |
| PgNIP2-2                                                                       | VTFNMMEVTVCAVATITAVGELAGLAVGSAVCITSIFAGAVSGGSMNPATLAPAVASNVITGLWLYFLGPVIGTSLGAWTYTYIFEEAPAKDG-PQRL     | 275 |
| PgNIP3-1                                                                       | ITPNLLFVVTVAVATITAVGELAGIAGAAVTNLNLVAGPTTGGSMNPVITLGPAAVAGNRQLWYLLATLGLAGAGVYTAVALRDENGETPRAQRS        | 299 |
| PgNIP3-2                                                                       | TTFVLLFIITALATDPNAVKELIAGVAGAIMMNALVAGPSTGASMNPAITLGPATIGRYTQIWIYVMVATPLGAVAGTGAYVVAIYLSVGPKNVILEI     | 272 |
| PgNIP3-3                                                                       | TTSVLLFIITALATDPNAVKELIAGVAGAIMMNALVAGPSTGASMNPAITLGPATIGRYTQIWIYVMVATPLGAVAGTGAYVVAIYLSVGPKNVILEI     | 259 |
| PgNIP3-4                                                                       | TTFVLLFVITATATDPNAVKELIAGVAGAAVMSALASGMSTGASMNPAITLGPATIAAGTYTKIWWYVMVAPPLGAIAGTGAYAAAL-----           | 248 |
| PgNIP3-5                                                                       | TTFVLFVVITATATDPNAVKELVAVGAGAAVMSALASGKSTGASMNPAITLGPATIGTYTKIWWYVMVAPPLGAIAGSGAYHAL-----              | 278 |
| PgNIP4-1                                                                       | ASAVLMIVIATAARGSSPT--AGGLAIGAAVGTGLGLIGPVSGGSMNPITLGPALVGRYTSVWYVLVAVAGMLLGCALCNRAVSSDAVLAFLCGRGV      | 277 |
| PgNIP1-1                                                                       | FLKSTGRNLNSSSSSS-----                                                                                  | 281 |
| PgNIP1-2                                                                       | FLRSARRN-----                                                                                          | 281 |
| PgNIP1-4                                                                       | RTN-----                                                                                               | 278 |
| PgNIP2-1                                                                       | SSFKLRLRQSQSVAADDDLDHIQV----                                                                           | 296 |
| PgNIP2-2                                                                       | SSFKLRRMQSQSALAAD-EFDTV-----                                                                           | 297 |
| PgNIP3-1                                                                       | FRR-----                                                                                               | 302 |
| PgNIP3-2                                                                       | LGQIIKEVK-----                                                                                         | 281 |
| PgNIP3-3                                                                       | -----                                                                                                  | 259 |
| PgNIP3-4                                                                       | -----                                                                                                  | 248 |
| PgNIP3-5                                                                       | -----                                                                                                  | 278 |
| PgNIP4-1                                                                       | GAAARKAGGRAPAALTAHAVAVASQQL                                                                            | 306 |
